# Supplementary material for: Machine Learning Models to Predict Protein–Protein Interaction Inhibitors
Source: MDPI journal article supplement (doi:10.3390/molecules27227986), 2022-11-17
Supplement: s1 [file s1]

# Machine learning models to predict protein-protein interaction inhibitors

Bárbara I. Díaz-Eufracio, José L. Medina-Franco

*DIFACQUIM research group, Department of Pharmacy, School of Chemistry, Universidad Nacional Autónoma de México, Avenida Universidad 3000, 04510 Mexico City, Mexico.*

## Contents

## Page

|                                                     |     |
|-----------------------------------------------------|-----|
| <b>Table S1.</b> PPI subfamilies and compounds.     | S2  |
| <b>Table S2.</b> RF setup information.              | S3  |
| <b>Table S3.</b> LRG setup information.             | S6  |
| <b>Table S4.</b> SVM setup information.             | S9  |
| <b>Table S5.</b> RF metrics values.                 | S11 |
| <b>Table S6.</b> LRF metrics values.                | S16 |
| <b>Table S7.</b> SVM metrics values.                | S20 |
| <b>Table S8.</b> Statistical values of RF models.   | S23 |
| <b>Table S9.</b> Statistical values of LRG models.  | S23 |
| <b>Table S10.</b> Statistical values of SVM models. | S23 |
| <b>Table S11.</b> RF models validation results.     | S24 |
| <b>Table S12.</b> LRG models validation results.    | S25 |
| <b>Table S13.</b> SVM models validation results.    | S26 |
| <b>Figure S1.</b> RF metrics heatmap.               | S27 |
| <b>Figure S2.</b> LRG metrics heatmap.              | S28 |
| <b>Figure S3.</b> SVM metrics heatmap.              | S29 |

**Table S1.** PPI subfamilies and compounds.

| PPI Subfamily                    | Number of compounds |
|----------------------------------|---------------------|
| BCL2-Like / BAX                  | 326                 |
| Bromodomain / Histone            | 277                 |
| CD4 / gp120                      | 119                 |
| CD80 / CD28                      | 73                  |
| E2 / E1                          | 10                  |
| FAK / VEGFR3                     | 2                   |
| IL2 / IL2R                       | 18                  |
| LEDGF / IN                       | 74                  |
| LFA / ICAM                       | 277                 |
| MDM2-Like / P53                  | 551                 |
| MDM2-Like / P53, MDM2-like dimer | 2                   |
| MDM2-like dimer                  | 2                   |
| MENIN / MLL                      | 20                  |
| MLLT1 / H3                       | 19                  |
| Myc / Max                        | 16                  |
| NRP / VEGF                       | 6                   |
| PCNA trimer                      | 10                  |
| Pygo PHD / H3                    | 8                   |
| SETDB1 / H3                      | 8                   |
| SPIN1 / H3                       | 26                  |
| TNF trimer                       | 1                   |
| TTR                              | 50                  |
| UPAR / UPA                       | 5                   |
| VEGF / VEGFR                     | 4                   |
| VHL / HIF1 $\alpha$              | 16                  |
| WD40 / H3                        | 7                   |
| WDR5/MLL                         | 28                  |
| XIAP / Smac                      | 272                 |

**Table S2.** RF setup information.

| FP   | PK           | Fingerprint | Test Set | Estimators | Criterion | Class weight |
|------|--------------|-------------|----------|------------|-----------|--------------|
| RF1  | RFF1L6P3EN1A | ECFP4       | 0.2      | 100        | entropy   | balanced     |
| RF2  | RFF1L6P3EN1B | ECFP4       | 0.2      | 100        | entropy   | None         |
| RF3  | RFF1L6P3EN2A | ECFP4       | 0.2      | 500        | entropy   | balanced     |
| RF4  | RFF1L6P3EN2B | ECFP4       | 0.2      | 500        | entropy   | None         |
| RF5  | RFF1L6P3EN3A | ECFP4       | 0.2      | 1000       | entropy   | balanced     |
| RF6  | RFF1L6P3EN3B | ECFP4       | 0.2      | 1000       | entropy   | None         |
| RF7  | RFF1L6P3GN1A | ECFP4       | 0.2      | 100        | gini      | balanced     |
| RF8  | RFF1L6P3GN1B | ECFP4       | 0.2      | 100        | gini      | None         |
| RF9  | RFF1L6P3GN2A | ECFP4       | 0.2      | 500        | gini      | balanced     |
| RF10 | RFF1L6P3GN2B | ECFP4       | 0.2      | 500        | gini      | None         |
| RF11 | RFF1L6P3GN3A | ECFP4       | 0.2      | 1000       | gini      | balanced     |
| RF12 | RFF1L6P3GN3B | ECFP4       | 0.2      | 1000       | gini      | None         |
| RF13 | RFF1L6P5EN1A | ECFP4       | 0.3      | 100        | entropy   | balanced     |
| RF14 | RFF1L6P5EN1B | ECFP4       | 0.3      | 100        | entropy   | None         |
| RF15 | RFF1L6P5EN2A | ECFP4       | 0.3      | 500        | entropy   | balanced     |
| RF16 | RFF1L6P5EN2B | ECFP4       | 0.3      | 500        | entropy   | None         |
| RF17 | RFF1L6P5EN3A | ECFP4       | 0.3      | 1000       | entropy   | balanced     |
| RF18 | RFF1L6P5EN3B | ECFP4       | 0.3      | 1000       | entropy   | None         |
| RF19 | RFF1L6P5GN1A | ECFP4       | 0.3      | 100        | gini      | balanced     |
| RF20 | RFF1L6P5GN1B | ECFP4       | 0.3      | 100        | gini      | None         |
| RF21 | RFF1L6P5GN2A | ECFP4       | 0.3      | 500        | gini      | balanced     |
| RF22 | RFF1L6P5GN2B | ECFP4       | 0.3      | 500        | gini      | None         |
| RF23 | RFF1L6P5GN3A | ECFP4       | 0.3      | 1000       | gini      | balanced     |
| RF24 | RFF1L6P5GN3B | ECFP4       | 0.3      | 1000       | gini      | None         |
| RF25 | RFF2L6P3EN1A | ECFP6       | 0.2      | 100        | entropy   | balanced     |
| RF26 | RFF2L6P3EN1B | ECFP6       | 0.2      | 100        | entropy   | None         |
| RF27 | RFF2L6P3EN2A | ECFP6       | 0.2      | 500        | entropy   | balanced     |

|      |              |           |     |      |         |          |
|------|--------------|-----------|-----|------|---------|----------|
| RF28 | RFF2L6P3EN2B | ECFP6     | 0.2 | 500  | entropy | None     |
| RF29 | RFF2L6P3EN3A | ECFP6     | 0.2 | 1000 | entropy | balanced |
| RF30 | RFF2L6P3EN3B | ECFP6     | 0.2 | 1000 | entropy | None     |
| RF31 | RFF2L6P3GN1A | ECFP6     | 0.2 | 100  | gini    | balanced |
| RF32 | RFF2L6P3GN1B | ECFP6     | 0.2 | 100  | gini    | None     |
| RF33 | RFF2L6P3GN2A | ECFP6     | 0.2 | 500  | gini    | balanced |
| RF34 | RFF2L6P3GN2B | ECFP6     | 0.2 | 500  | gini    | None     |
| RF35 | RFF2L6P3GN3A | ECFP6     | 0.2 | 1000 | gini    | balanced |
| RF36 | RFF2L6P3GN3B | ECFP6     | 0.2 | 1000 | gini    | None     |
| RF37 | RFF2L6P5EN1A | ECFP6     | 0.3 | 100  | entropy | balanced |
| RF38 | RFF2L6P5EN1B | ECFP6     | 0.3 | 100  | entropy | None     |
| RF39 | RFF2L6P5EN2A | ECFP6     | 0.3 | 500  | entropy | balanced |
| RF40 | RFF2L6P5EN2B | ECFP6     | 0.3 | 500  | entropy | None     |
| RF41 | RFF2L6P5EN3A | ECFP6     | 0.3 | 1000 | entropy | balanced |
| RF42 | RFF2L6P5EN3B | ECFP6     | 0.3 | 1000 | entropy | None     |
| RF43 | RFF2L6P5GN1A | ECFP6     | 0.3 | 100  | gini    | balanced |
| RF44 | RFF2L6P5GN1B | ECFP6     | 0.3 | 100  | gini    | None     |
| RF45 | RFF2L6P5GN2A | ECFP6     | 0.3 | 500  | gini    | balanced |
| RF46 | RFF2L6P5GN2B | ECFP6     | 0.3 | 500  | gini    | None     |
| RF47 | RFF2L6P5GN3A | ECFP6     | 0.3 | 1000 | gini    | balanced |
| RF48 | RFF2L6P5GN3B | ECFP6     | 0.3 | 1000 | gini    | None     |
| RF49 | RFF3L6P3EN1A | MACCSKEYS | 0.2 | 100  | entropy | balanced |
| RF50 | RFF3L6P3EN1B | MACCSKEYS | 0.2 | 100  | entropy | None     |
| RF51 | RFF3L6P3EN2A | MACCSKEYS | 0.2 | 500  | entropy | balanced |
| RF52 | RFF3L6P3EN2B | MACCSKEYS | 0.2 | 500  | entropy | None     |
| RF53 | RFF3L6P3EN3A | MACCSKEYS | 0.2 | 1000 | entropy | balanced |
| RF54 | RFF3L6P3EN3B | MACCSKEYS | 0.2 | 1000 | entropy | None     |
| RF55 | RFF3L6P3GN1A | MACCSKEYS | 0.2 | 100  | gini    | balanced |
| RF56 | RFF3L6P3GN1B | MACCSKEYS | 0.2 | 100  | gini    | None     |
| RF57 | RFF3L6P3GN2A | MACCSKEYS | 0.2 | 500  | gini    | balanced |
| RF58 | RFF3L6P3GN2B | MACCSKEYS | 0.2 | 500  | gini    | None     |
| RF59 | RFF3L6P3GN3A | MACCSKEYS | 0.2 | 1000 | gini    | balanced |

|      |              |           |     |      |         |          |
|------|--------------|-----------|-----|------|---------|----------|
| RF60 | RFF3L6P3GN3B | MACCSKEYS | 0.2 | 1000 | gini    | None     |
| RF61 | RFF3L6P5EN1A | MACCSKEYS | 0.3 | 100  | entropy | balanced |
| RF62 | RFF3L6P5EN1B | MACCSKEYS | 0.3 | 100  | entropy | None     |
| RF63 | RFF3L6P5EN2A | MACCSKEYS | 0.3 | 500  | entropy | balanced |
| RF64 | RFF3L6P5EN2B | MACCSKEYS | 0.3 | 500  | entropy | None     |
| RF65 | RFF3L6P5EN3A | MACCSKEYS | 0.3 | 1000 | entropy | balanced |
| RF66 | RFF3L6P5EN3B | MACCSKEYS | 0.3 | 1000 | entropy | None     |
| RF67 | RFF3L6P5GN1A | MACCSKEYS | 0.3 | 100  | gini    | balanced |
| RF68 | RFF3L6P5GN1B | MACCSKEYS | 0.3 | 100  | gini    | None     |
| RF69 | RFF3L6P5GN2A | MACCSKEYS | 0.3 | 500  | gini    | balanced |
| RF70 | RFF3L6P5GN2B | MACCSKEYS | 0.3 | 500  | gini    | None     |
| RF71 | RFF3L6P5GN3A | MACCSKEYS | 0.3 | 1000 | gini    | balanced |
| RF72 | RFF3L6P5GN3B | MACCSKEYS | 0.3 | 1000 | gini    | None     |
| RF73 | RFF4L6P3EN1A | AtomPairs | 0.2 | 100  | entropy | balanced |
| RF74 | RFF4L6P3EN1B | AtomPairs | 0.2 | 100  | entropy | None     |
| RF75 | RFF4L6P3EN2A | AtomPairs | 0.2 | 500  | entropy | balanced |
| RF76 | RFF4L6P3EN2B | AtomPairs | 0.2 | 500  | entropy | None     |
| RF77 | RFF4L6P3EN3A | AtomPairs | 0.2 | 1000 | entropy | balanced |
| RF78 | RFF4L6P3EN3B | AtomPairs | 0.2 | 1000 | entropy | None     |
| RF79 | RFF4L6P3GN1A | AtomPairs | 0.2 | 100  | gini    | balanced |
| RF80 | RFF4L6P3GN1B | AtomPairs | 0.2 | 100  | gini    | None     |
| RF81 | RFF4L6P3GN2A | AtomPairs | 0.2 | 500  | gini    | balanced |
| RF82 | RFF4L6P3GN2B | AtomPairs | 0.2 | 500  | gini    | None     |
| RF83 | RFF4L6P3GN3A | AtomPairs | 0.2 | 1000 | gini    | balanced |
| RF84 | RFF4L6P3GN3B | AtomPairs | 0.2 | 1000 | gini    | None     |
| RF85 | RFF4L6P5EN1A | AtomPairs | 0.3 | 100  | entropy | balanced |
| RF86 | RFF4L6P5EN1B | AtomPairs | 0.3 | 100  | entropy | None     |
| RF87 | RFF4L6P5EN2A | AtomPairs | 0.3 | 500  | entropy | balanced |
| RF88 | RFF4L6P5EN2B | AtomPairs | 0.3 | 500  | entropy | None     |
| RF89 | RFF4L6P5EN3A | AtomPairs | 0.3 | 1000 | entropy | balanced |
| RF90 | RFF4L6P5EN3B | AtomPairs | 0.3 | 1000 | entropy | None     |
| RF91 | RFF4L6P5GN1A | AtomPairs | 0.3 | 100  | gini    | balanced |

|      |              |           |     |      |      |          |
|------|--------------|-----------|-----|------|------|----------|
| RF92 | RFF4L6P5GN1B | AtomPairs | 0.3 | 100  | gini | None     |
| RF93 | RFF4L6P5GN2A | AtomPairs | 0.3 | 500  | gini | balanced |
| RF94 | RFF4L6P5GN2B | AtomPairs | 0.3 | 500  | gini | None     |
| RF95 | RFF4L6P5GN3A | AtomPairs | 0.3 | 1000 | gini | balanced |
| RF96 | RFF4L6P5GN3B | AtomPairs | 0.3 | 1000 | gini | None     |

**Table S3.** LRG setup information.

| FK    | PK           | Fingerprint | Test set proportion | Solver    | Class weight |
|-------|--------------|-------------|---------------------|-----------|--------------|
| LRG1  | LRGF1L6P3S1A | ECFP4       | 0.2                 | newton-cg | balanced     |
| LRG2  | LRGF1L6P3S1B | ECFP4       | 0.2                 | newton-cg | None         |
| LRG3  | LRGF1L6P3S2A | ECFP4       | 0.2                 | lbfgs     | balanced     |
| LRG4  | LRGF1L6P3S2B | ECFP4       | 0.2                 | lbfgs     | None         |
| LRG5  | LRGF1L6P3S3A | ECFP4       | 0.2                 | liblinear | balanced     |
| LRG6  | LRGF1L6P3S3B | ECFP4       | 0.2                 | liblinear | None         |
| LRG7  | LRGF1L6P3S4A | ECFP4       | 0.2                 | sag       | balanced     |
| LRG8  | LRGF1L6P3S4B | ECFP4       | 0.2                 | sag       | None         |
| LRG9  | LRGF1L6P3S5A | ECFP4       | 0.2                 | saga      | balanced     |
| LRG10 | LRGF1L6P3S5B | ECFP4       | 0.2                 | saga      | None         |
| LRG11 | LRGF1L6P5S1A | ECFP4       | 0.3                 | newton-cg | balanced     |
| LRG12 | LRGF1L6P5S1B | ECFP4       | 0.3                 | newton-cg | None         |
| LRG13 | LRGF1L6P5S2A | ECFP4       | 0.3                 | lbfgs     | balanced     |
| LRG14 | LRGF1L6P5S2B | ECFP4       | 0.3                 | lbfgs     | None         |
| LRG15 | LRGF1L6P5S3A | ECFP4       | 0.3                 | liblinear | balanced     |
| LRG16 | LRGF1L6P5S3B | ECFP4       | 0.3                 | liblinear | None         |
| LRG17 | LRGF1L6P5S4A | ECFP4       | 0.3                 | sag       | balanced     |
| LRG18 | LRGF1L6P5S4B | ECFP4       | 0.3                 | sag       | None         |
| LRG19 | LRGF1L6P5S5A | ECFP4       | 0.3                 | saga      | balanced     |
| LRG20 | LRGF1L6P5S5B | ECFP4       | 0.3                 | saga      | None         |
| LRG21 | LRGF2L6P3S1A | ECFP6       | 0.2                 | newton-cg | balanced     |
| LRG22 | LRGF2L6P3S1B | ECFP6       | 0.2                 | newton-cg | None         |
| LRG23 | LRGF2L6P3S2A | ECFP6       | 0.2                 | lbfgs     | balanced     |

|       |              |           |     |           |          |
|-------|--------------|-----------|-----|-----------|----------|
| LRG24 | LRGF2L6P3S2B | ECFP6     | 0.2 | lbfgs     | None     |
| LRG25 | LRGF2L6P3S3A | ECFP6     | 0.2 | liblinear | balanced |
| LRG26 | LRGF2L6P3S3B | ECFP6     | 0.2 | liblinear | None     |
| LRG27 | LRGF2L6P3S4A | ECFP6     | 0.2 | sag       | balanced |
| LRG28 | LRGF2L6P3S4B | ECFP6     | 0.2 | sag       | None     |
| LRG29 | LRGF2L6P3S5A | ECFP6     | 0.2 | saga      | balanced |
| LRG30 | LRGF2L6P3S5B | ECFP6     | 0.2 | saga      | None     |
| LRG31 | LRGF2L6P5S1A | ECFP6     | 0.3 | newton-cg | balanced |
| LRG32 | LRGF2L6P5S1B | ECFP6     | 0.3 | newton-cg | None     |
| LRG33 | LRGF2L6P5S2A | ECFP6     | 0.3 | lbfgs     | balanced |
| LRG34 | LRGF2L6P5S2B | ECFP6     | 0.3 | lbfgs     | None     |
| LRG35 | LRGF2L6P5S3A | ECFP6     | 0.3 | liblinear | balanced |
| LRG36 | LRGF2L6P5S3B | ECFP6     | 0.3 | liblinear | None     |
| LRG37 | LRGF2L6P5S4A | ECFP6     | 0.3 | sag       | balanced |
| LRG38 | LRGF2L6P5S4B | ECFP6     | 0.3 | sag       | None     |
| LRG39 | LRGF2L6P5S5A | ECFP6     | 0.3 | saga      | balanced |
| LRG40 | LRGF2L6P5S5B | ECFP6     | 0.3 | saga      | None     |
| LRG41 | LRGF3L6P3S1A | MACCSKEYS | 0.2 | newton-cg | balanced |
| LRG42 | LRGF3L6P3S1B | MACCSKEYS | 0.2 | newton-cg | None     |
| LRG43 | LRGF3L6P3S2A | MACCSKEYS | 0.2 | lbfgs     | balanced |
| LRG44 | LRGF3L6P3S2B | MACCSKEYS | 0.2 | lbfgs     | None     |
| LRG45 | LRGF3L6P3S3A | MACCSKEYS | 0.2 | liblinear | balanced |
| LRG46 | LRGF3L6P3S3B | MACCSKEYS | 0.2 | liblinear | None     |
| LRG47 | LRGF3L6P3S4A | MACCSKEYS | 0.2 | sag       | balanced |
| LRG48 | LRGF3L6P3S4B | MACCSKEYS | 0.2 | sag       | None     |
| LRG49 | LRGF3L6P3S5A | MACCSKEYS | 0.2 | saga      | balanced |
| LRG50 | LRGF3L6P3S5B | MACCSKEYS | 0.2 | saga      | None     |
| LRG51 | LRGF3L6P5S1A | MACCSKEYS | 0.3 | newton-cg | balanced |
| LRG52 | LRGF3L6P5S1B | MACCSKEYS | 0.3 | newton-cg | None     |
| LRG53 | LRGF3L6P5S2A | MACCSKEYS | 0.3 | lbfgs     | balanced |
| LRG54 | LRGF3L6P5S2B | MACCSKEYS | 0.3 | lbfgs     | None     |
| LRG55 | LRGF3L6P5S3A | MACCSKEYS | 0.3 | liblinear | balanced |

|       |              |           |     |           |          |
|-------|--------------|-----------|-----|-----------|----------|
| LRG56 | LRGF3L6P5S3B | MACCSKEYS | 0.3 | liblinear | None     |
| LRG57 | LRGF3L6P5S4A | MACCSKEYS | 0.3 | sag       | balanced |
| LRG58 | LRGF3L6P5S4B | MACCSKEYS | 0.3 | sag       | None     |
| LRG59 | LRGF3L6P5S5A | MACCSKEYS | 0.3 | saga      | balanced |
| LRG60 | LRGF3L6P5S5B | MACCSKEYS | 0.3 | saga      | None     |
| LRG61 | LRGF4L6P3S1A | AtomPairs | 0.2 | newton-cg | balanced |
| LRG62 | LRGF4L6P3S1B | AtomPairs | 0.2 | newton-cg | None     |
| LRG63 | LRGF4L6P3S2A | AtomPairs | 0.2 | lbfgs     | balanced |
| LRG64 | LRGF4L6P3S2B | AtomPairs | 0.2 | lbfgs     | None     |
| LRG65 | LRGF4L6P3S3A | AtomPairs | 0.2 | liblinear | balanced |
| LRG66 | LRGF4L6P3S3B | AtomPairs | 0.2 | liblinear | None     |
| LRG67 | LRGF4L6P3S4A | AtomPairs | 0.2 | sag       | balanced |
| LRG68 | LRGF4L6P3S4B | AtomPairs | 0.2 | sag       | None     |
| LRG69 | LRGF4L6P3S5A | AtomPairs | 0.2 | saga      | balanced |
| LRG70 | LRGF4L6P3S5B | AtomPairs | 0.2 | saga      | None     |
| LRG71 | LRGF4L6P5S1A | AtomPairs | 0.3 | newton-cg | balanced |
| LRG72 | LRGF4L6P5S1B | AtomPairs | 0.3 | newton-cg | None     |
| LRG73 | LRGF4L6P5S2A | AtomPairs | 0.3 | lbfgs     | balanced |
| LRG74 | LRGF4L6P5S2B | AtomPairs | 0.3 | lbfgs     | None     |
| LRG75 | LRGF4L6P5S3A | AtomPairs | 0.3 | liblinear | balanced |
| LRG76 | LRGF4L6P5S3B | AtomPairs | 0.3 | liblinear | None     |
| LRG77 | LRGF4L6P5S4A | AtomPairs | 0.3 | sag       | balanced |
| LRG78 | LRGF4L6P5S4B | AtomPairs | 0.3 | sag       | None     |
| LRG79 | LRGF4L6P5S5A | AtomPairs | 0.3 | saga      | balanced |
| LRG80 | LRGF4L6P5S5B | AtomPairs | 0.3 | saga      | None     |

**Table S4.** SVM setup information.

| FK   | PK           | Fingerprint | Test set proportion | Kernel | Class weight |
|------|--------------|-------------|---------------------|--------|--------------|
| SVM1 | SVMF1L6P3K1A | ECFP4       | 0.2                 | linear | Balanced     |
| SVM2 | SVMF1L6P3K1B | ECFP4       | 0.2                 | linear | None         |
| SVM3 | SVMF1L6P3K2A | ECFP4       | 0.2                 | poly   | Balanced     |



|       |              |           |     |         |          |
|-------|--------------|-----------|-----|---------|----------|
| SVM4  | SVMF1L6P3K2B | ECFP4     | 0.2 | poly    | None     |
| SVM5  | SVMF1L6P3K3A | ECFP4     | 0.2 | rbf     | Balanced |
| SVM6  | SVMF1L6P3K3B | ECFP4     | 0.2 | rbf     | None     |
| SVM7  | SVMF1L6P3K4A | ECFP4     | 0.2 | sigmoid | Balanced |
| SVM8  | SVMF1L6P3K4B | ECFP4     | 0.2 | sigmoid | None     |
| SVM9  | SVMF1L6P5K1A | ECFP4     | 0.3 | linear  | Balanced |
| SVM10 | SVMF1L6P5K1B | ECFP4     | 0.3 | linear  | None     |
| SVM11 | SVMF1L6P5K2A | ECFP4     | 0.3 | poly    | Balanced |
| SVM12 | SVMF1L6P5K2B | ECFP4     | 0.3 | poly    | None     |
| SVM13 | SVMF1L6P5K3A | ECFP4     | 0.3 | rbf     | Balanced |
| SVM14 | SVMF1L6P5K3B | ECFP4     | 0.3 | rbf     | None     |
| SVM15 | SVMF1L6P5K4A | ECFP4     | 0.3 | sigmoid | Balanced |
| SVM16 | SVMF1L6P5K4B | ECFP4     | 0.3 | sigmoid | None     |
| SVM17 | SVMF2L6P3K1A | ECFP6     | 0.2 | linear  | Balanced |
| SVM18 | SVMF2L6P3K1B | ECFP6     | 0.2 | linear  | None     |
| SVM19 | SVMF2L6P3K2A | ECFP6     | 0.2 | poly    | Balanced |
| SVM20 | SVMF2L6P3K2B | ECFP6     | 0.2 | poly    | None     |
| SVM21 | SVMF2L6P3K3A | ECFP6     | 0.2 | rbf     | Balanced |
| SVM22 | SVMF2L6P3K3B | ECFP6     | 0.2 | rbf     | None     |
| SVM23 | SVMF2L6P3K4A | ECFP6     | 0.2 | sigmoid | Balanced |
| SVM24 | SVMF2L6P3K4B | ECFP6     | 0.2 | sigmoid | None     |
| SVM25 | SVMF2L6P5K1A | ECFP6     | 0.3 | linear  | Balanced |
| SVM26 | SVMF2L6P5K1B | ECFP6     | 0.3 | linear  | None     |
| SVM27 | SVMF2L6P5K2A | ECFP6     | 0.3 | poly    | Balanced |
| SVM28 | SVMF2L6P5K2B | ECFP6     | 0.3 | poly    | None     |
| SVM29 | SVMF2L6P5K3A | ECFP6     | 0.3 | rbf     | Balanced |
| SVM30 | SVMF2L6P5K3B | ECFP6     | 0.3 | rbf     | None     |
| SVM31 | SVMF2L6P5K4A | ECFP6     | 0.3 | sigmoid | Balanced |
| SVM32 | SVMF2L6P5K4B | ECFP6     | 0.3 | sigmoid | None     |
| SVM33 | SVMF3L6P3K1A | MACCSKEYS | 0.2 | linear  | Balanced |
| SVM34 | SVMF3L6P3K1B | MACCSKEYS | 0.2 | linear  | None     |
| SVM35 | SVMF3L6P3K2A | MACCSKEYS | 0.2 | poly    | Balanced |

|       |              |           |     |         |          |
|-------|--------------|-----------|-----|---------|----------|
| SVM36 | SVMF3L6P3K2B | MACCSKEYS | 0.2 | poly    | None     |
| SVM37 | SVMF3L6P3K3A | MACCSKEYS | 0.2 | rbf     | Balanced |
| SVM38 | SVMF3L6P3K3B | MACCSKEYS | 0.2 | rbf     | None     |
| SVM39 | SVMF3L6P3K4A | MACCSKEYS | 0.2 | sigmoid | Balanced |
| SVM40 | SVMF3L6P3K4B | MACCSKEYS | 0.2 | sigmoid | None     |
| SVM41 | SVMF3L6P5K1A | MACCSKEYS | 0.3 | linear  | Balanced |
| SVM42 | SVMF3L6P5K1B | MACCSKEYS | 0.3 | linear  | None     |
| SVM43 | SVMF3L6P5K2A | MACCSKEYS | 0.3 | poly    | Balanced |
| SVM44 | SVMF3L6P5K2B | MACCSKEYS | 0.3 | poly    | None     |
| SVM45 | SVMF3L6P5K3A | MACCSKEYS | 0.3 | rbf     | Balanced |
| SVM46 | SVMF3L6P5K3B | MACCSKEYS | 0.3 | rbf     | None     |
| SVM47 | SVMF3L6P5K4A | MACCSKEYS | 0.3 | sigmoid | Balanced |
| SVM48 | SVMF3L6P5K4B | MACCSKEYS | 0.3 | sigmoid | None     |
| SVM49 | SVMF4L6P3K1A | AtomPairs | 0.2 | linear  | Balanced |
| SVM50 | SVMF4L6P3K1B | AtomPairs | 0.2 | linear  | None     |
| SVM51 | SVMF4L6P3K2A | AtomPairs | 0.2 | poly    | Balanced |
| SVM52 | SVMF4L6P3K2B | AtomPairs | 0.2 | poly    | None     |
| SVM53 | SVMF4L6P3K3A | AtomPairs | 0.2 | rbf     | Balanced |
| SVM54 | SVMF4L6P3K3B | AtomPairs | 0.2 | rbf     | None     |
| SVM55 | SVMF4L6P3K4A | AtomPairs | 0.2 | sigmoid | Balanced |
| SVM56 | SVMF4L6P3K4B | AtomPairs | 0.2 | sigmoid | None     |
| SVM57 | SVMF4L6P5K1A | AtomPairs | 0.3 | linear  | Balanced |
| SVM58 | SVMF4L6P5K1B | AtomPairs | 0.3 | linear  | None     |
| SVM59 | SVMF4L6P5K2A | AtomPairs | 0.3 | poly    | Balanced |
| SVM60 | SVMF4L6P5K2B | AtomPairs | 0.3 | poly    | None     |
| SVM61 | SVMF4L6P5K3A | AtomPairs | 0.3 | rbf     | Balanced |
| SVM62 | SVMF4L6P5K3B | AtomPairs | 0.3 | rbf     | None     |
| SVM63 | SVMF4L6P5K4A | AtomPairs | 0.3 | sigmoid | Balanced |
| SVM64 | SVMF4L6P5K4B | AtomPairs | 0.3 | sigmoid | None     |

**Table S5.** RF metrics values.

|      | Accuracy | Balanced Accuracy | Precision | F1   | Recall | Confusion matrix      |
|------|----------|-------------------|-----------|------|--------|-----------------------|
| RF1  | 0.95     | 0.95              | 0.98      | 0.95 | 0.92   | [483 10]<br>[ 33 400] |
| RF2  | 0.95     | 0.95              | 0.97      | 0.95 | 0.93   | [480 13]<br>[ 29 404] |
| RF3  | 0.96     | 0.96              | 0.97      | 0.95 | 0.94   | [481 12]<br>[ 27 406] |
| RF4  | 0.96     | 0.96              | 0.98      | 0.96 | 0.94   | [483 10]<br>[ 28 405] |
| RF5  | 0.95     | 0.95              | 0.97      | 0.95 | 0.93   | [481 12]<br>[ 30 403] |
| RF6  | 0.96     | 0.96              | 0.98      | 0.96 | 0.94   | [483 10]<br>[ 28 405] |
| RF7  | 0.96     | 0.96              | 0.97      | 0.95 | 0.94   | [480 13]<br>[ 26 407] |
| RF8  | 0.95     | 0.95              | 0.96      | 0.95 | 0.94   | [477 16]<br>[ 26 407] |
| RF9  | 0.96     | 0.96              | 0.97      | 0.95 | 0.94   | [480 13]<br>[ 26 407] |
| RF10 | 0.96     | 0.95              | 0.96      | 0.95 | 0.94   | [478 15]<br>[ 26 407] |
| RF11 | 0.96     | 0.96              | 0.97      | 0.95 | 0.94   | [480 13]<br>[ 27 406] |
| RF12 | 0.96     | 0.95              | 0.97      | 0.95 | 0.94   | [479 14]<br>[ 27 406] |
| RF13 | 0.95     | 0.95              | 0.96      | 0.95 | 0.94   | [711 25]<br>[ 40 613] |
| RF14 | 0.95     | 0.95              | 0.95      | 0.95 | 0.94   | [704 32]<br>[ 38 615] |
| RF15 | 0.95     | 0.95              | 0.96      | 0.95 | 0.94   | [711 25]<br>[ 41 612] |
| RF16 | 0.95     | 0.95              | 0.96      | 0.95 | 0.94   | [710 26]<br>[ 41 612] |
| RF17 | 0.95     | 0.95              | 0.96      | 0.95 | 0.94   | [712 24]<br>[ 41 612] |
| RF18 | 0.95     | 0.95              | 0.96      | 0.95 | 0.94   | [709 27]<br>[ 42 611] |
| RF19 | 0.95     | 0.95              | 0.96      | 0.95 | 0.94   | [709 27]<br>[ 39 614] |

|      |      |      |      |      |      |                       |
|------|------|------|------|------|------|-----------------------|
| RF20 | 0.95 | 0.95 | 0.95 | 0.95 | 0.95 | [705 31]<br>[ 33 620] |
| RF21 | 0.96 | 0.95 | 0.96 | 0.95 | 0.95 | [708 28]<br>[ 34 619] |
| RF22 | 0.95 | 0.95 | 0.96 | 0.95 | 0.94 | [709 27]<br>[ 38 615] |
| RF23 | 0.95 | 0.95 | 0.96 | 0.95 | 0.94 | [709 27]<br>[ 37 616] |
| RF24 | 0.95 | 0.95 | 0.96 | 0.95 | 0.94 | [709 27]<br>[ 36 617] |
| RF25 | 0.95 | 0.95 | 0.98 | 0.95 | 0.92 | [483 10]<br>[ 33 400] |
| RF26 | 0.95 | 0.95 | 0.98 | 0.95 | 0.91 | [484 9]<br>[ 37 396]  |
| RF27 | 0.96 | 0.96 | 0.98 | 0.95 | 0.93 | [486 7]<br>[ 32 401]  |
| RF28 | 0.95 | 0.95 | 0.98 | 0.95 | 0.92 | [484 9]<br>[ 35 398]  |
| RF29 | 0.95 | 0.95 | 0.98 | 0.95 | 0.92 | [483 10]<br>[ 35 398] |
| RF30 | 0.95 | 0.95 | 0.97 | 0.95 | 0.92 | [482 11]<br>[ 35 398] |
| RF31 | 0.95 | 0.95 | 0.96 | 0.94 | 0.92 | [477 16]<br>[ 33 400] |
| RF32 | 0.95 | 0.95 | 0.97 | 0.95 | 0.93 | [479 14]<br>[ 29 404] |
| RF33 | 0.95 | 0.95 | 0.97 | 0.95 | 0.93 | [481 12]<br>[ 32 401] |
| RF34 | 0.95 | 0.95 | 0.97 | 0.95 | 0.93 | [479 14]<br>[ 30 403] |
| RF35 | 0.95 | 0.95 | 0.97 | 0.95 | 0.93 | [481 12]<br>[ 30 403] |
| RF36 | 0.95 | 0.95 | 0.97 | 0.95 | 0.93 | [479 14]<br>[ 29 404] |
| RF37 | 0.95 | 0.95 | 0.96 | 0.94 | 0.93 | [709 27]<br>[ 47 606] |
| RF38 | 0.95 | 0.95 | 0.96 | 0.95 | 0.93 | [711 25]<br>[ 45 608] |
| RF39 | 0.95 | 0.95 | 0.96 | 0.95 | 0.93 | [710 26]<br>[ 44 609] |

|      |      |      |      |      |      |                       |
|------|------|------|------|------|------|-----------------------|
| RF40 | 0.95 | 0.95 | 0.96 | 0.95 | 0.93 | [711 25]<br>[ 43 610] |
| RF41 | 0.95 | 0.95 | 0.96 | 0.95 | 0.93 | [711 25]<br>[ 45 608] |
| RF42 | 0.95 | 0.95 | 0.96 | 0.95 | 0.93 | [712 24]<br>[ 43 610] |
| RF43 | 0.95 | 0.95 | 0.95 | 0.94 | 0.93 | [706 30]<br>[ 43 610] |
| RF44 | 0.95 | 0.95 | 0.95 | 0.94 | 0.93 | [706 30]<br>[ 45 608] |
| RF45 | 0.95 | 0.95 | 0.96 | 0.95 | 0.93 | [711 25]<br>[ 43 610] |
| RF46 | 0.95 | 0.94 | 0.95 | 0.94 | 0.93 | [706 30]<br>[ 46 607] |
| RF47 | 0.95 | 0.95 | 0.96 | 0.94 | 0.93 | [709 27]<br>[ 45 608] |
| RF48 | 0.94 | 0.94 | 0.95 | 0.94 | 0.93 | [703 33]<br>[ 45 608] |
| RF49 | 0.94 | 0.94 | 0.93 | 0.93 | 0.94 | [463 30]<br>[ 28 405] |
| RF50 | 0.94 | 0.94 | 0.93 | 0.94 | 0.94 | [462 31]<br>[ 25 408] |
| RF51 | 0.94 | 0.94 | 0.93 | 0.94 | 0.94 | [463 30]<br>[ 25 408] |
| RF52 | 0.94 | 0.94 | 0.93 | 0.94 | 0.95 | [462 31]<br>[ 23 410] |
| RF53 | 0.94 | 0.94 | 0.93 | 0.94 | 0.94 | [462 31]<br>[ 25 408] |
| RF54 | 0.94 | 0.94 | 0.93 | 0.94 | 0.95 | [463 30]<br>[ 23 410] |
| RF55 | 0.94 | 0.94 | 0.93 | 0.93 | 0.94 | [463 30]<br>[ 27 406] |
| RF56 | 0.94 | 0.94 | 0.92 | 0.93 | 0.94 | [460 33]<br>[ 27 406] |
| RF57 | 0.94 | 0.94 | 0.93 | 0.94 | 0.94 | [462 31]<br>[ 24 409] |
| RF58 | 0.94 | 0.94 | 0.93 | 0.93 | 0.94 | [460 33]<br>[ 24 409] |
| RF59 | 0.94 | 0.94 | 0.93 | 0.94 | 0.94 | [462 31]<br>[ 24 409] |

|      |      |      |      |      |      |                       |
|------|------|------|------|------|------|-----------------------|
| RF60 | 0.94 | 0.94 | 0.93 | 0.94 | 0.94 | [461 32]<br>[ 24 409] |
| RF61 | 0.93 | 0.93 | 0.91 | 0.93 | 0.94 | [676 60]<br>[ 36 617] |
| RF62 | 0.93 | 0.93 | 0.91 | 0.93 | 0.95 | [676 60]<br>[ 32 621] |
| RF63 | 0.93 | 0.93 | 0.91 | 0.93 | 0.95 | [676 60]<br>[ 33 620] |
| RF64 | 0.93 | 0.93 | 0.91 | 0.93 | 0.95 | [676 60]<br>[ 32 621] |
| RF65 | 0.93 | 0.93 | 0.91 | 0.93 | 0.95 | [674 62]<br>[ 31 622] |
| RF66 | 0.94 | 0.94 | 0.91 | 0.93 | 0.95 | [677 59]<br>[ 31 622] |
| RF67 | 0.93 | 0.93 | 0.92 | 0.93 | 0.95 | [679 57]<br>[ 35 618] |
| RF68 | 0.94 | 0.94 | 0.92 | 0.94 | 0.95 | [684 52]<br>[ 33 620] |
| RF69 | 0.94 | 0.94 | 0.92 | 0.93 | 0.95 | [679 57]<br>[ 31 622] |
| RF70 | 0.94 | 0.94 | 0.92 | 0.94 | 0.96 | [685 51]<br>[ 29 624] |
| RF71 | 0.94 | 0.94 | 0.92 | 0.94 | 0.95 | [681 55]<br>[ 31 622] |
| RF72 | 0.94 | 0.94 | 0.92 | 0.94 | 0.96 | [682 54]<br>[ 29 624] |
| RF73 | 0.94 | 0.94 | 0.93 | 0.93 | 0.94 | [461 32]<br>[ 27 406] |
| RF74 | 0.93 | 0.93 | 0.92 | 0.93 | 0.94 | [456 37]<br>[ 27 406] |
| RF75 | 0.93 | 0.93 | 0.92 | 0.93 | 0.94 | [456 37]<br>[ 27 406] |
| RF76 | 0.93 | 0.93 | 0.92 | 0.93 | 0.94 | [457 36]<br>[ 27 406] |
| RF77 | 0.93 | 0.93 | 0.91 | 0.93 | 0.94 | [454 39]<br>[ 26 407] |
| RF78 | 0.93 | 0.93 | 0.92 | 0.93 | 0.94 | [456 37]<br>[ 27 406] |
| RF79 | 0.94 | 0.94 | 0.93 | 0.93 | 0.94 | [461 32]<br>[ 28 405] |

|      |      |      |      |      |      |                       |
|------|------|------|------|------|------|-----------------------|
| RF80 | 0.93 | 0.93 | 0.92 | 0.93 | 0.94 | [457 36]<br>[ 27 406] |
| RF81 | 0.93 | 0.93 | 0.92 | 0.93 | 0.94 | [456 37]<br>[ 27 406] |
| RF82 | 0.94 | 0.94 | 0.92 | 0.93 | 0.94 | [458 35]<br>[ 24 409] |
| RF83 | 0.93 | 0.93 | 0.92 | 0.93 | 0.94 | [456 37]<br>[ 26 407] |
| RF84 | 0.93 | 0.93 | 0.91 | 0.93 | 0.94 | [455 38]<br>[ 25 408] |
| RF85 | 0.94 | 0.94 | 0.93 | 0.93 | 0.94 | [689 47]<br>[ 42 611] |
| RF86 | 0.93 | 0.93 | 0.93 | 0.93 | 0.94 | [687 49]<br>[ 42 611] |
| RF87 | 0.93 | 0.93 | 0.92 | 0.93 | 0.94 | [684 52]<br>[ 42 611] |
| RF88 | 0.93 | 0.93 | 0.92 | 0.93 | 0.94 | [683 53]<br>[ 40 613] |
| RF89 | 0.93 | 0.93 | 0.92 | 0.93 | 0.94 | [684 52]<br>[ 41 612] |
| RF90 | 0.93 | 0.93 | 0.92 | 0.93 | 0.94 | [682 54]<br>[ 40 613] |
| RF91 | 0.93 | 0.93 | 0.92 | 0.93 | 0.94 | [684 52]<br>[ 41 612] |
| RF92 | 0.93 | 0.93 | 0.92 | 0.93 | 0.94 | [682 54]<br>[ 39 614] |
| RF93 | 0.93 | 0.93 | 0.92 | 0.93 | 0.94 | [683 53]<br>[ 39 614] |
| RF94 | 0.93 | 0.93 | 0.92 | 0.93 | 0.94 | [680 56]<br>[ 41 612] |
| RF95 | 0.93 | 0.93 | 0.92 | 0.93 | 0.94 | [683 53]<br>[ 41 612] |
| RF96 | 0.93 | 0.93 | 0.91 | 0.93 | 0.94 | [678 58]<br>[ 39 614] |

**Table S6.** LRF metrics values.

|      | Accuracy | Balanced Accuracy | Precision | F1   | Recall | Confusion matrix      |
|------|----------|-------------------|-----------|------|--------|-----------------------|
| LRG1 | 0.94     | 0.94              | 0.94      | 0.94 | 0.93   | [469 24]<br>[ 30 403] |

|       |      |      |      |      |      |                       |
|-------|------|------|------|------|------|-----------------------|
| LRG2  | 0.94 | 0.94 | 0.94 | 0.94 | 0.93 | [469 24]<br>[ 30 403] |
| LRG3  | 0.94 | 0.94 | 0.94 | 0.94 | 0.93 | [469 24]<br>[ 30 403] |
| LRG4  | 0.94 | 0.94 | 0.94 | 0.94 | 0.93 | [469 24]<br>[ 30 403] |
| LRG5  | 0.94 | 0.94 | 0.94 | 0.93 | 0.93 | [467 26]<br>[ 31 402] |
| LRG6  | 0.94 | 0.94 | 0.94 | 0.93 | 0.93 | [467 26]<br>[ 32 401] |
| LRG7  | 0.94 | 0.94 | 0.94 | 0.94 | 0.93 | [469 24]<br>[ 30 403] |
| LRG8  | 0.94 | 0.94 | 0.94 | 0.94 | 0.93 | [469 24]<br>[ 30 403] |
| LRG9  | 0.94 | 0.94 | 0.94 | 0.94 | 0.93 | [468 25]<br>[ 30 403] |
| LRG10 | 0.94 | 0.94 | 0.95 | 0.94 | 0.93 | [471 22]<br>[ 31 402] |
| LRG11 | 0.94 | 0.94 | 0.93 | 0.94 | 0.94 | [689 47]<br>[ 36 617] |
| LRG12 | 0.94 | 0.94 | 0.93 | 0.94 | 0.94 | [689 47]<br>[ 36 617] |
| LRG13 | 0.94 | 0.94 | 0.93 | 0.94 | 0.94 | [689 47]<br>[ 36 617] |
| LRG14 | 0.94 | 0.94 | 0.93 | 0.94 | 0.94 | [689 47]<br>[ 36 617] |
| LRG15 | 0.94 | 0.94 | 0.93 | 0.93 | 0.94 | [688 48]<br>[ 38 615] |
| LRG16 | 0.94 | 0.94 | 0.93 | 0.93 | 0.94 | [688 48]<br>[ 38 615] |
| LRG17 | 0.94 | 0.94 | 0.93 | 0.94 | 0.94 | [689 47]<br>[ 36 617] |
| LRG18 | 0.94 | 0.94 | 0.93 | 0.94 | 0.94 | [689 47]<br>[ 37 616] |
| LRG19 | 0.94 | 0.94 | 0.93 | 0.94 | 0.94 | [688 48]<br>[ 37 616] |
| LRG20 | 0.94 | 0.94 | 0.93 | 0.94 | 0.94 | [688 48]<br>[ 37 616] |
| LRG21 | 0.95 | 0.95 | 0.94 | 0.94 | 0.94 | [469 24]<br>[ 26 407] |



|       |      |      |      |      |      |                       |
|-------|------|------|------|------|------|-----------------------|
| LRG22 | 0.95 | 0.95 | 0.95 | 0.94 | 0.94 | [470 23]<br>[ 27 406] |
| LRG23 | 0.95 | 0.95 | 0.94 | 0.94 | 0.94 | [469 24]<br>[ 26 407] |
| LRG24 | 0.95 | 0.95 | 0.95 | 0.94 | 0.94 | [470 23]<br>[ 27 406] |
| LRG25 | 0.94 | 0.94 | 0.94 | 0.94 | 0.94 | [465 28]<br>[ 27 406] |
| LRG26 | 0.94 | 0.94 | 0.94 | 0.94 | 0.94 | [465 28]<br>[ 28 405] |
| LRG27 | 0.95 | 0.95 | 0.95 | 0.94 | 0.94 | [470 23]<br>[ 26 407] |
| LRG28 | 0.94 | 0.94 | 0.95 | 0.94 | 0.94 | [470 23]<br>[ 28 405] |
| LRG29 | 0.94 | 0.94 | 0.94 | 0.94 | 0.94 | [469 24]<br>[ 27 406] |
| LRG30 | 0.94 | 0.94 | 0.95 | 0.94 | 0.94 | [470 23]<br>[ 28 405] |
| LRG31 | 0.94 | 0.94 | 0.93 | 0.94 | 0.94 | [687 49]<br>[ 36 617] |
| LRG32 | 0.94 | 0.94 | 0.93 | 0.93 | 0.94 | [687 49]<br>[ 38 615] |
| LRG33 | 0.94 | 0.94 | 0.93 | 0.94 | 0.94 | [687 49]<br>[ 36 617] |
| LRG34 | 0.94 | 0.94 | 0.93 | 0.93 | 0.94 | [687 49]<br>[ 38 615] |
| LRG35 | 0.94 | 0.94 | 0.93 | 0.94 | 0.95 | [690 46]<br>[ 33 620] |
| LRG36 | 0.94 | 0.94 | 0.93 | 0.94 | 0.95 | [690 46]<br>[ 33 620] |
| LRG37 | 0.94 | 0.94 | 0.92 | 0.93 | 0.94 | [685 51]<br>[ 36 617] |
| LRG38 | 0.94 | 0.94 | 0.93 | 0.94 | 0.94 | [687 49]<br>[ 36 617] |
| LRG39 | 0.94 | 0.94 | 0.93 | 0.94 | 0.95 | [687 49]<br>[ 33 620] |
| LRG40 | 0.94 | 0.94 | 0.93 | 0.94 | 0.95 | [688 48]<br>[ 34 619] |
| LRG41 | 0.86 | 0.86 | 0.84 | 0.86 | 0.88 | [421 72]<br>[ 54 379] |

|       |      |      |      |      |      |                        |
|-------|------|------|------|------|------|------------------------|
| LRG42 | 0.86 | 0.86 | 0.84 | 0.86 | 0.87 | [421 72]<br>[ 55 378]  |
| LRG43 | 0.86 | 0.86 | 0.84 | 0.86 | 0.88 | [421 72]<br>[ 54 379]  |
| LRG44 | 0.86 | 0.86 | 0.84 | 0.86 | 0.87 | [421 72]<br>[ 55 378]  |
| LRG45 | 0.87 | 0.87 | 0.84 | 0.86 | 0.88 | [422 71]<br>[ 54 379]  |
| LRG46 | 0.87 | 0.87 | 0.84 | 0.86 | 0.88 | [422 71]<br>[ 54 379]  |
| LRG47 | 0.86 | 0.86 | 0.84 | 0.86 | 0.88 | [421 72]<br>[ 54 379]  |
| LRG48 | 0.86 | 0.86 | 0.84 | 0.86 | 0.88 | [421 72]<br>[ 54 379]  |
| LRG49 | 0.86 | 0.86 | 0.84 | 0.86 | 0.88 | [421 72]<br>[ 54 379]  |
| LRG50 | 0.86 | 0.86 | 0.84 | 0.86 | 0.88 | [421 72]<br>[ 54 379]  |
| LRG51 | 0.87 | 0.87 | 0.84 | 0.86 | 0.88 | [627 109]<br>[ 78 575] |
| LRG52 | 0.86 | 0.86 | 0.84 | 0.86 | 0.87 | [629 107]<br>[ 83 570] |
| LRG53 | 0.87 | 0.87 | 0.84 | 0.86 | 0.88 | [627 109]<br>[ 77 576] |
| LRG54 | 0.86 | 0.86 | 0.84 | 0.86 | 0.87 | [630 106]<br>[ 84 569] |
| LRG55 | 0.87 | 0.87 | 0.84 | 0.86 | 0.88 | [626 110]<br>[ 77 576] |
| LRG56 | 0.87 | 0.87 | 0.85 | 0.86 | 0.87 | [633 103]<br>[ 82 571] |
| LRG57 | 0.87 | 0.87 | 0.84 | 0.86 | 0.88 | [627 109]<br>[ 78 575] |
| LRG58 | 0.86 | 0.86 | 0.84 | 0.86 | 0.87 | [629 107]<br>[ 83 570] |
| LRG59 | 0.87 | 0.87 | 0.84 | 0.86 | 0.88 | [627 109]<br>[ 77 576] |
| LRG60 | 0.86 | 0.86 | 0.84 | 0.86 | 0.87 | [630 106]<br>[ 83 570] |
| LRG61 | 0.94 | 0.94 | 0.93 | 0.93 | 0.94 | [461 32]<br>[ 28 405]  |

|       |      |      |      |      |      |                        |
|-------|------|------|------|------|------|------------------------|
| LRG62 | 0.93 | 0.93 | 0.93 | 0.93 | 0.93 | [461 32]<br>[ 29 404]  |
| LRG63 | 0.94 | 0.94 | 0.93 | 0.93 | 0.94 | [461 32]<br>[ 26 407]  |
| LRG64 | 0.94 | 0.94 | 0.92 | 0.93 | 0.94 | [460 33]<br>[ 27 406]  |
| LRG65 | 0.94 | 0.94 | 0.93 | 0.93 | 0.94 | [461 32]<br>[ 27 406]  |
| LRG66 | 0.93 | 0.93 | 0.92 | 0.93 | 0.94 | [459 34]<br>[ 27 406]  |
| LRG67 | 0.84 | 0.85 | 0.81 | 0.84 | 0.87 | [407 86]<br>[ 58 375]  |
| LRG68 | 0.85 | 0.85 | 0.82 | 0.84 | 0.86 | [412 81]<br>[ 62 371]  |
| LRG69 | 0.84 | 0.84 | 0.78 | 0.84 | 0.9  | [384 109]<br>[ 43 390] |
| LRG70 | 0.83 | 0.84 | 0.79 | 0.83 | 0.89 | [389 104]<br>[ 49 384] |
| LRG71 | 0.93 | 0.93 | 0.91 | 0.92 | 0.94 | [676 60]<br>[ 42 611]  |
| LRG72 | 0.93 | 0.93 | 0.91 | 0.92 | 0.93 | [677 59]<br>[ 43 610]  |
| LRG73 | 0.93 | 0.93 | 0.91 | 0.92 | 0.93 | [679 57]<br>[ 44 609]  |
| LRG74 | 0.93 | 0.93 | 0.91 | 0.92 | 0.94 | [678 58]<br>[ 42 611]  |
| LRG75 | 0.93 | 0.93 | 0.91 | 0.92 | 0.94 | [676 60]<br>[ 41 612]  |
| LRG76 | 0.93 | 0.93 | 0.91 | 0.92 | 0.94 | [675 61]<br>[ 42 611]  |
| LRG77 | 0.85 | 0.85 | 0.81 | 0.84 | 0.89 | [596 140]<br>[ 74 579] |
| LRG78 | 0.85 | 0.85 | 0.81 | 0.84 | 0.88 | [603 133]<br>[ 80 573] |
| LRG79 | 0.83 | 0.83 | 0.76 | 0.83 | 0.91 | [550 186]<br>[ 56 597] |
| LRG80 | 0.83 | 0.83 | 0.77 | 0.83 | 0.91 | [557 179]<br>[ 61 592] |

**Table S7.** SVM metrics values.

|       | Accuracy | Balanced Accuracy | Precision | F1   | Recall | Confusion matrix      |
|-------|----------|-------------------|-----------|------|--------|-----------------------|
| SVM1  | 0.94     | 0.94              | 0.94      | 0.94 | 0.94   | [465 28]<br>[ 27 406] |
| SVM2  | 0.94     | 0.94              | 0.93      | 0.93 | 0.94   | [463 30]<br>[ 27 406] |
| SVM3  | 0.94     | 0.94              | 0.98      | 0.93 | 0.89   | [487 6]<br>[ 49 384]  |
| SVM4  | 0.94     | 0.94              | 0.98      | 0.93 | 0.89   | [487 6]<br>[ 49 384]  |
| SVM5  | 0.95     | 0.95              | 0.97      | 0.95 | 0.93   | [481 12]<br>[ 31 402] |
| SVM6  | 0.95     | 0.95              | 0.97      | 0.95 | 0.92   | [482 11]<br>[ 33 400] |
| SVM7  | 0.9      | 0.9               | 0.89      | 0.9  | 0.9    | [446 47]<br>[ 43 390] |
| SVM8  | 0.9      | 0.9               | 0.89      | 0.9  | 0.9    | [446 47]<br>[ 43 390] |
| SVM9  | 0.94     | 0.94              | 0.93      | 0.94 | 0.94   | [689 47]<br>[ 38 615] |
| SVM10 | 0.94     | 0.94              | 0.93      | 0.94 | 0.94   | [690 46]<br>[ 38 615] |
| SVM11 | 0.94     | 0.94              | 0.98      | 0.93 | 0.89   | [724 12]<br>[ 73 580] |
| SVM12 | 0.94     | 0.93              | 0.98      | 0.93 | 0.89   | [724 12]<br>[ 75 578] |
| SVM13 | 0.95     | 0.95              | 0.96      | 0.95 | 0.94   | [713 23]<br>[ 42 611] |
| SVM14 | 0.95     | 0.95              | 0.96      | 0.95 | 0.93   | [713 23]<br>[ 43 610] |
| SVM15 | 0.91     | 0.91              | 0.89      | 0.9  | 0.91   | [664 72]<br>[ 57 596] |
| SVM16 | 0.91     | 0.91              | 0.9       | 0.9  | 0.91   | [668 68]<br>[ 62 591] |
| SVM17 | 0.94     | 0.94              | 0.93      | 0.93 | 0.93   | [464 29]<br>[ 29 404] |
| SVM18 | 0.94     | 0.93              | 0.93      | 0.93 | 0.93   | [465 28]<br>[ 32 401] |
| SVM19 | 0.93     | 0.92              | 0.99      | 0.92 | 0.86   | [488 5]<br>[ 61 372]  |

|       |      |      |      |      |      |                        |
|-------|------|------|------|------|------|------------------------|
| SVM20 | 0.93 | 0.92 | 0.99 | 0.92 | 0.86 | [488 5]<br>[ 62 371]   |
| SVM21 | 0.95 | 0.95 | 0.98 | 0.95 | 0.92 | [483 10]<br>[ 33 400]  |
| SVM22 | 0.95 | 0.95 | 0.98 | 0.95 | 0.92 | [484 9]<br>[ 33 400]   |
| SVM23 | 0.92 | 0.92 | 0.91 | 0.91 | 0.91 | [453 40]<br>[ 37 396]  |
| SVM24 | 0.92 | 0.92 | 0.91 | 0.91 | 0.91 | [455 38]<br>[ 40 393]  |
| SVM25 | 0.93 | 0.93 | 0.91 | 0.93 | 0.94 | [677 59]<br>[ 36 617]  |
| SVM26 | 0.93 | 0.93 | 0.92 | 0.93 | 0.94 | [679 57]<br>[ 38 615]  |
| SVM27 | 0.93 | 0.92 | 0.98 | 0.92 | 0.87 | [722 14]<br>[ 88 565]  |
| SVM28 | 0.93 | 0.92 | 0.98 | 0.92 | 0.86 | [722 14]<br>[ 89 564]  |
| SVM29 | 0.95 | 0.95 | 0.97 | 0.95 | 0.93 | [714 22]<br>[ 46 607]  |
| SVM30 | 0.95 | 0.95 | 0.97 | 0.95 | 0.93 | [714 22]<br>[ 46 607]  |
| SVM31 | 0.91 | 0.91 | 0.9  | 0.91 | 0.91 | [668 68]<br>[ 56 597]  |
| SVM32 | 0.91 | 0.91 | 0.9  | 0.9  | 0.91 | [669 67]<br>[ 60 593]  |
| SVM33 | 0.87 | 0.88 | 0.85 | 0.87 | 0.88 | [427 66]<br>[ 50 383]  |
| SVM34 | 0.87 | 0.87 | 0.85 | 0.86 | 0.87 | [428 65]<br>[ 56 377]  |
| SVM35 | 0.94 | 0.94 | 0.94 | 0.93 | 0.93 | [465 28]<br>[ 30 403]  |
| SVM36 | 0.94 | 0.94 | 0.94 | 0.93 | 0.93 | [466 27]<br>[ 32 401]  |
| SVM37 | 0.92 | 0.92 | 0.91 | 0.92 | 0.93 | [451 42]<br>[ 29 404]  |
| SVM38 | 0.92 | 0.92 | 0.91 | 0.92 | 0.93 | [452 41]<br>[ 32 401]  |
| SVM39 | 0.62 | 0.62 | 0.59 | 0.59 | 0.58 | [322 171]<br>[182 251] |

|       |      |      |      |      |      |                        |
|-------|------|------|------|------|------|------------------------|
| SVM40 | 0.62 | 0.62 | 0.6  | 0.58 | 0.57 | [327 166]<br>[186 247] |
| SVM41 | 0.88 | 0.88 | 0.85 | 0.87 | 0.9  | [632 104]<br>[ 66 587] |
| SVM42 | 0.88 | 0.88 | 0.85 | 0.87 | 0.89 | [637 99]<br>[ 71 582]  |
| SVM43 | 0.94 | 0.94 | 0.93 | 0.93 | 0.93 | [690 46]<br>[ 43 610]  |
| SVM44 | 0.94 | 0.94 | 0.93 | 0.93 | 0.93 | [691 45]<br>[ 43 610]  |
| SVM45 | 0.92 | 0.92 | 0.9  | 0.92 | 0.94 | [667 69]<br>[ 41 612]  |
| SVM46 | 0.92 | 0.92 | 0.9  | 0.92 | 0.94 | [668 68]<br>[ 42 611]  |
| SVM47 | 0.62 | 0.62 | 0.6  | 0.6  | 0.6  | [473 263]<br>[260 393] |
| SVM48 | 0.63 | 0.63 | 0.61 | 0.6  | 0.59 | [485 251]<br>[265 388] |
| SVM49 | 0.93 | 0.93 | 0.91 | 0.92 | 0.93 | [455 38]<br>[ 30 403]  |
| SVM50 | 0.92 | 0.92 | 0.91 | 0.92 | 0.93 | [452 41]<br>[ 32 401]  |
| SVM51 | 0.81 | 0.8  | 0.91 | 0.77 | 0.66 | [464 29]<br>[146 287]  |
| SVM52 | 0.81 | 0.8  | 0.91 | 0.76 | 0.66 | [464 29]<br>[148 285]  |
| SVM53 | 0.89 | 0.89 | 0.9  | 0.88 | 0.86 | [451 42]<br>[ 59 374]  |
| SVM54 | 0.89 | 0.89 | 0.9  | 0.88 | 0.86 | [454 39]<br>[ 62 371]  |
| SVM55 | 0.79 | 0.79 | 0.79 | 0.77 | 0.75 | [407 86]<br>[109 324]  |
| SVM56 | 0.79 | 0.78 | 0.8  | 0.76 | 0.73 | [411 82]<br>[115 318]  |
| SVM57 | 0.91 | 0.91 | 0.89 | 0.91 | 0.93 | [659 77]<br>[ 47 606]  |
| SVM58 | 0.91 | 0.91 | 0.89 | 0.91 | 0.93 | [662 74]<br>[ 47 606]  |
| SVM59 | 0.82 | 0.81 | 0.91 | 0.78 | 0.69 | [690 46]<br>[205 448]  |

|       |      |      |      |      |      |                        |
|-------|------|------|------|------|------|------------------------|
| SVM60 | 0.82 | 0.81 | 0.91 | 0.78 | 0.68 | [691 45]<br>[208 445]  |
| SVM61 | 0.89 | 0.89 | 0.89 | 0.88 | 0.87 | [669 67]<br>[ 84 569]  |
| SVM62 | 0.89 | 0.89 | 0.9  | 0.88 | 0.87 | [670 66]<br>[ 85 568]  |
| SVM63 | 0.81 | 0.8  | 0.81 | 0.79 | 0.77 | [614 122]<br>[147 506] |
| SVM64 | 0.81 | 0.8  | 0.81 | 0.79 | 0.77 | [614 122]<br>[148 505] |

**Table S8.** Statistical values of RF models.

|                   | count | mean | std  | min  | 25%  | 50%  | 75%  | max  |
|-------------------|-------|------|------|------|------|------|------|------|
| Accuracy          | 96    | 0.94 | 0.01 | 0.93 | 0.93 | 0.94 | 0.95 | 0.96 |
| Balanced Accuracy | 96    | 0.94 | 0.01 | 0.93 | 0.93 | 0.94 | 0.95 | 0.96 |
| Precision         | 96    | 0.94 | 0.02 | 0.91 | 0.92 | 0.94 | 0.96 | 0.98 |
| F1                | 96    | 0.94 | 0.01 | 0.93 | 0.93 | 0.94 | 0.95 | 0.96 |
| Recall            | 96    | 0.94 | 0.01 | 0.91 | 0.93 | 0.94 | 0.94 | 0.96 |

**Table S9.** Statistical values of LRG models.

|                   | count | mean | std  | min  | 25%  | 50%  | 75%  | max  |
|-------------------|-------|------|------|------|------|------|------|------|
| Accuracy          | 80    | 0.91 | 0.04 | 0.83 | 0.87 | 0.94 | 0.94 | 0.95 |
| Balanced Accuracy | 80    | 0.91 | 0.04 | 0.83 | 0.87 | 0.94 | 0.94 | 0.95 |
| Precision         | 80    | 0.9  | 0.05 | 0.76 | 0.84 | 0.93 | 0.93 | 0.95 |
| F1                | 80    | 0.91 | 0.04 | 0.83 | 0.86 | 0.93 | 0.94 | 0.94 |
| Recall            | 80    | 0.92 | 0.03 | 0.86 | 0.88 | 0.93 | 0.94 | 0.95 |

**Table S10.** Statistical values of SVM models.

|                   | count | mean | std  | min  | 25%  | 50%  | 75%  | max  |
|-------------------|-------|------|------|------|------|------|------|------|
| Accuracy          | 64    | 0.89 | 0.08 | 0.62 | 0.89 | 0.92 | 0.94 | 0.95 |
| Balanced Accuracy | 64    | 0.89 | 0.08 | 0.62 | 0.89 | 0.92 | 0.94 | 0.95 |

|           |    |      |      |      |      |      |      |      |
|-----------|----|------|------|------|------|------|------|------|
| Precision | 64 | 0.90 | 0.09 | 0.59 | 0.89 | 0.91 | 0.94 | 0.99 |
| F1        | 64 | 0.88 | 0.09 | 0.58 | 0.88 | 0.92 | 0.93 | 0.95 |
| Recall    | 64 | 0.87 | 0.1  | 0.57 | 0.86 | 0.91 | 0.93 | 0.94 |

**Table S11.** RF models validation results.

| model | accuracy mean | accuracy std |
|-------|---------------|--------------|
| RF3   | 0.957         | 0.013        |
| RF4   | 0.958         | 0.014        |
| RF6   | 0.958         | 0.014        |
| RF7   | 0.959         | 0.012        |
| RF8   | 0.955         | 0.015        |
| RF9   | 0.957         | 0.013        |
| RF10  | 0.956         | 0.014        |
| RF11  | 0.957         | 0.013        |
| RF12  | 0.957         | 0.013        |
| RF13  | 0.958         | 0.014        |
| RF14  | 0.958         | 0.012        |
| RF15  | 0.957         | 0.013        |
| RF16  | 0.958         | 0.014        |
| RF17  | 0.957         | 0.013        |
| RF18  | 0.958         | 0.014        |
| RF19  | 0.959         | 0.012        |
| RF20  | 0.955         | 0.015        |
| RF21  | 0.957         | 0.013        |
| RF22  | 0.956         | 0.014        |
| RF23  | 0.957         | 0.013        |
| RF24  | 0.957         | 0.013        |
| RF27  | 0.957         | 0.014        |

Note: only those models with metrics greater than the statistical metric Q2 were validated.

**Table S12.** LRG models validation results.

| Model | accuracy mean | accuracy std |
|-------|---------------|--------------|
| LRG1  | 0.948         | 0.017        |



|       |       |       |
|-------|-------|-------|
| LRG2  | 0.949 | 0.017 |
| LRG3  | 0.948 | 0.017 |
| LRG4  | 0.949 | 0.017 |
| LRG5  | 0.949 | 0.017 |
| LRG6  | 0.949 | 0.017 |
| LRG7  | 0.948 | 0.017 |
| LRG8  | 0.949 | 0.017 |
| LRG9  | 0.95  | 0.016 |
| LRG10 | 0.95  | 0.017 |
| LRG11 | 0.948 | 0.017 |
| LRG12 | 0.949 | 0.017 |
| LRG13 | 0.948 | 0.017 |
| LRG14 | 0.949 | 0.017 |
| LRG15 | 0.949 | 0.017 |
| LRG16 | 0.949 | 0.017 |
| LRG17 | 0.948 | 0.017 |
| LRG18 | 0.949 | 0.017 |
| LRG19 | 0.95  | 0.016 |
| LRG20 | 0.95  | 0.017 |
| LRG21 | 0.941 | 0.017 |
| LRG22 | 0.941 | 0.017 |
| LRG23 | 0.941 | 0.017 |
| LRG24 | 0.941 | 0.017 |
| LRG25 | 0.941 | 0.017 |
| LRG26 | 0.94  | 0.018 |
| LRG27 | 0.941 | 0.017 |
| LRG28 | 0.941 | 0.018 |
| LRG29 | 0.942 | 0.017 |
| LRG30 | 0.942 | 0.017 |
| LRG31 | 0.941 | 0.017 |
| LRG32 | 0.941 | 0.017 |
| LRG33 | 0.941 | 0.017 |
| LRG34 | 0.941 | 0.017 |
| LRG35 | 0.941 | 0.017 |

|       |       |       |
|-------|-------|-------|
| LRG36 | 0.94  | 0.018 |
| LRG38 | 0.941 | 0.018 |
| LRG39 | 0.942 | 0.017 |
| LRG40 | 0.942 | 0.017 |
| LRG61 | 0.938 | 0.014 |
| LRG63 | 0.938 | 0.015 |
| LRG65 | 0.937 | 0.015 |

Note: only those models with metrics greater than the statistical metric Q2 were validated.

**Table S13.** SVM models validation results.

| Model | accuracy mean | accuracy std |
|-------|---------------|--------------|
| SVM1  | 0.941         | 0.014        |
| SVM2  | 0.942         | 0.014        |
| SVM5  | 0.963         | 0.014        |
| SVM6  | 0.963         | 0.013        |
| SVM9  | 0.941         | 0.014        |
| SVM10 | 0.942         | 0.014        |
| SVM13 | 0.963         | 0.014        |
| SVM14 | 0.963         | 0.013        |
| SVM17 | 0.935         | 0.021        |
| SVM18 | 0.937         | 0.019        |
| SVM21 | 0.958         | 0.015        |
| SVM22 | 0.958         | 0.015        |
| SVM25 | 0.935         | 0.021        |
| SVM26 | 0.937         | 0.019        |
| SVM29 | 0.958         | 0.015        |
| SVM30 | 0.958         | 0.015        |
| SVM35 | 0.94          | 0.015        |
| SVM36 | 0.939         | 0.015        |
| SVM37 | 0.926         | 0.016        |
| SVM38 | 0.927         | 0.017        |
| SVM43 | 0.94          | 0.015        |
| SVM44 | 0.939         | 0.015        |
| SVM49 | 0.914         | 0.017        |

---

|       |       |       |
|-------|-------|-------|
| SVM50 | 0.916 | 0.017 |
|-------|-------|-------|

Note: only those models with metrics greater than the statistical metric Q2 were validated

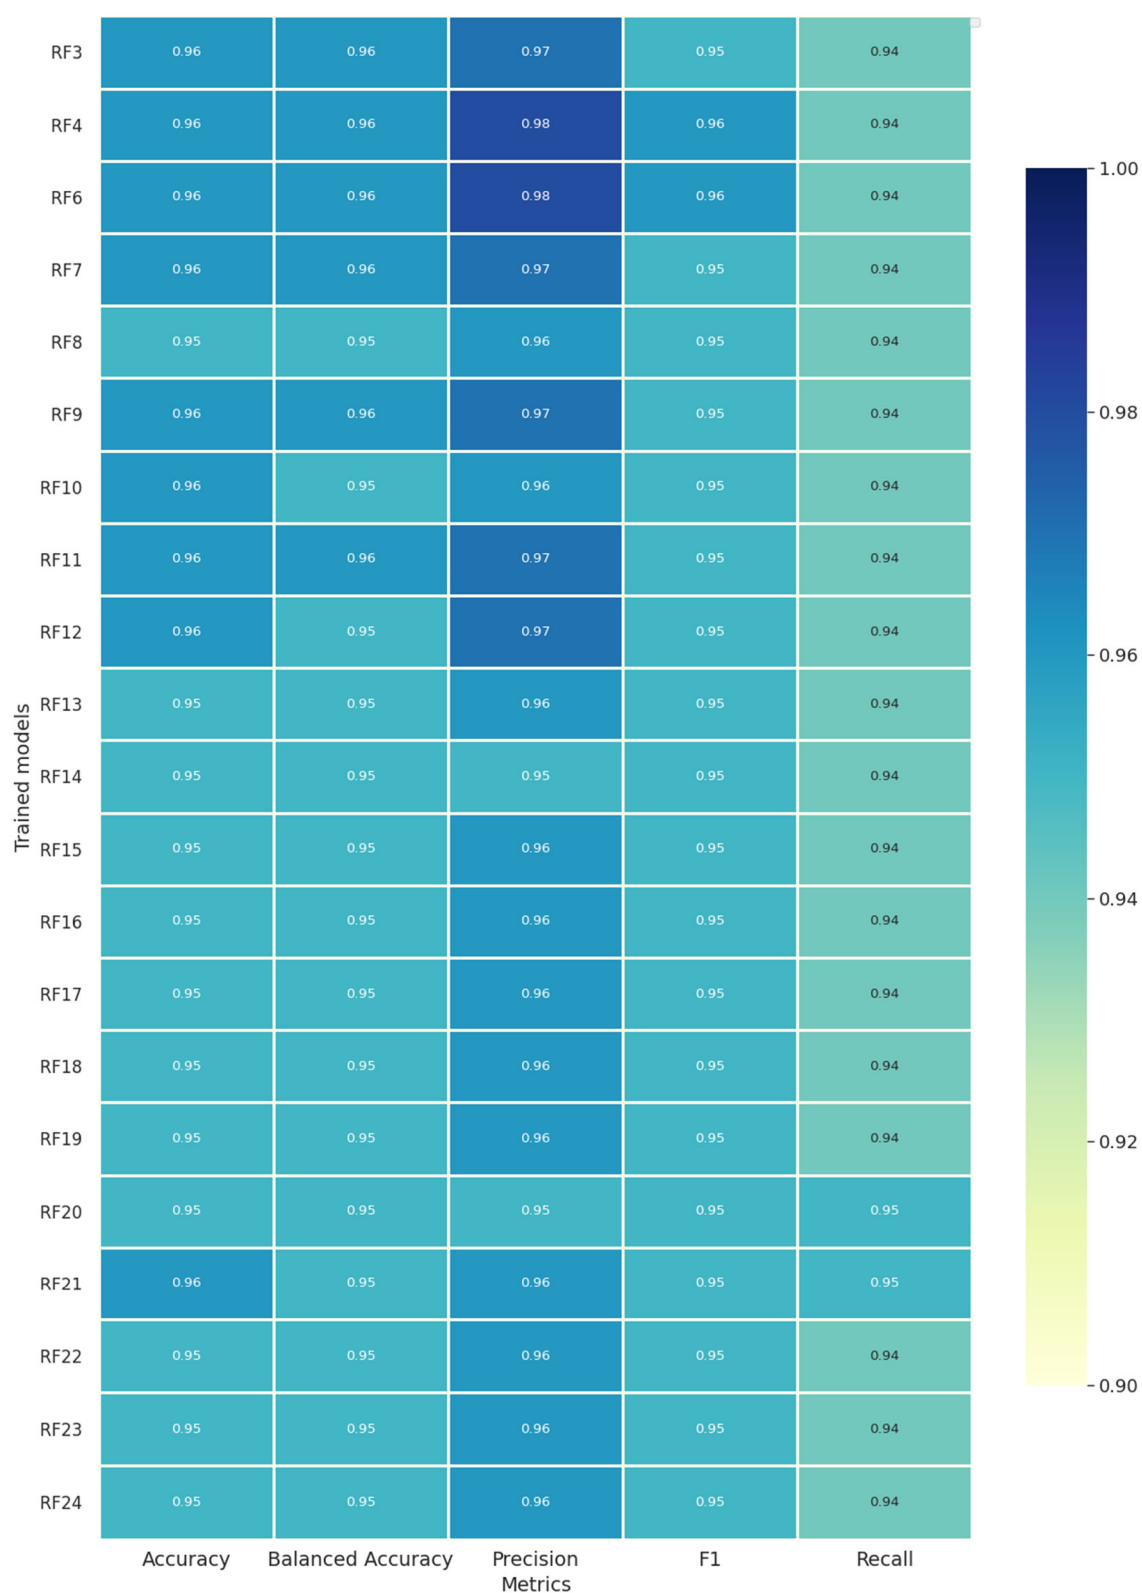**Figure S1.** RF metrics heatmap.

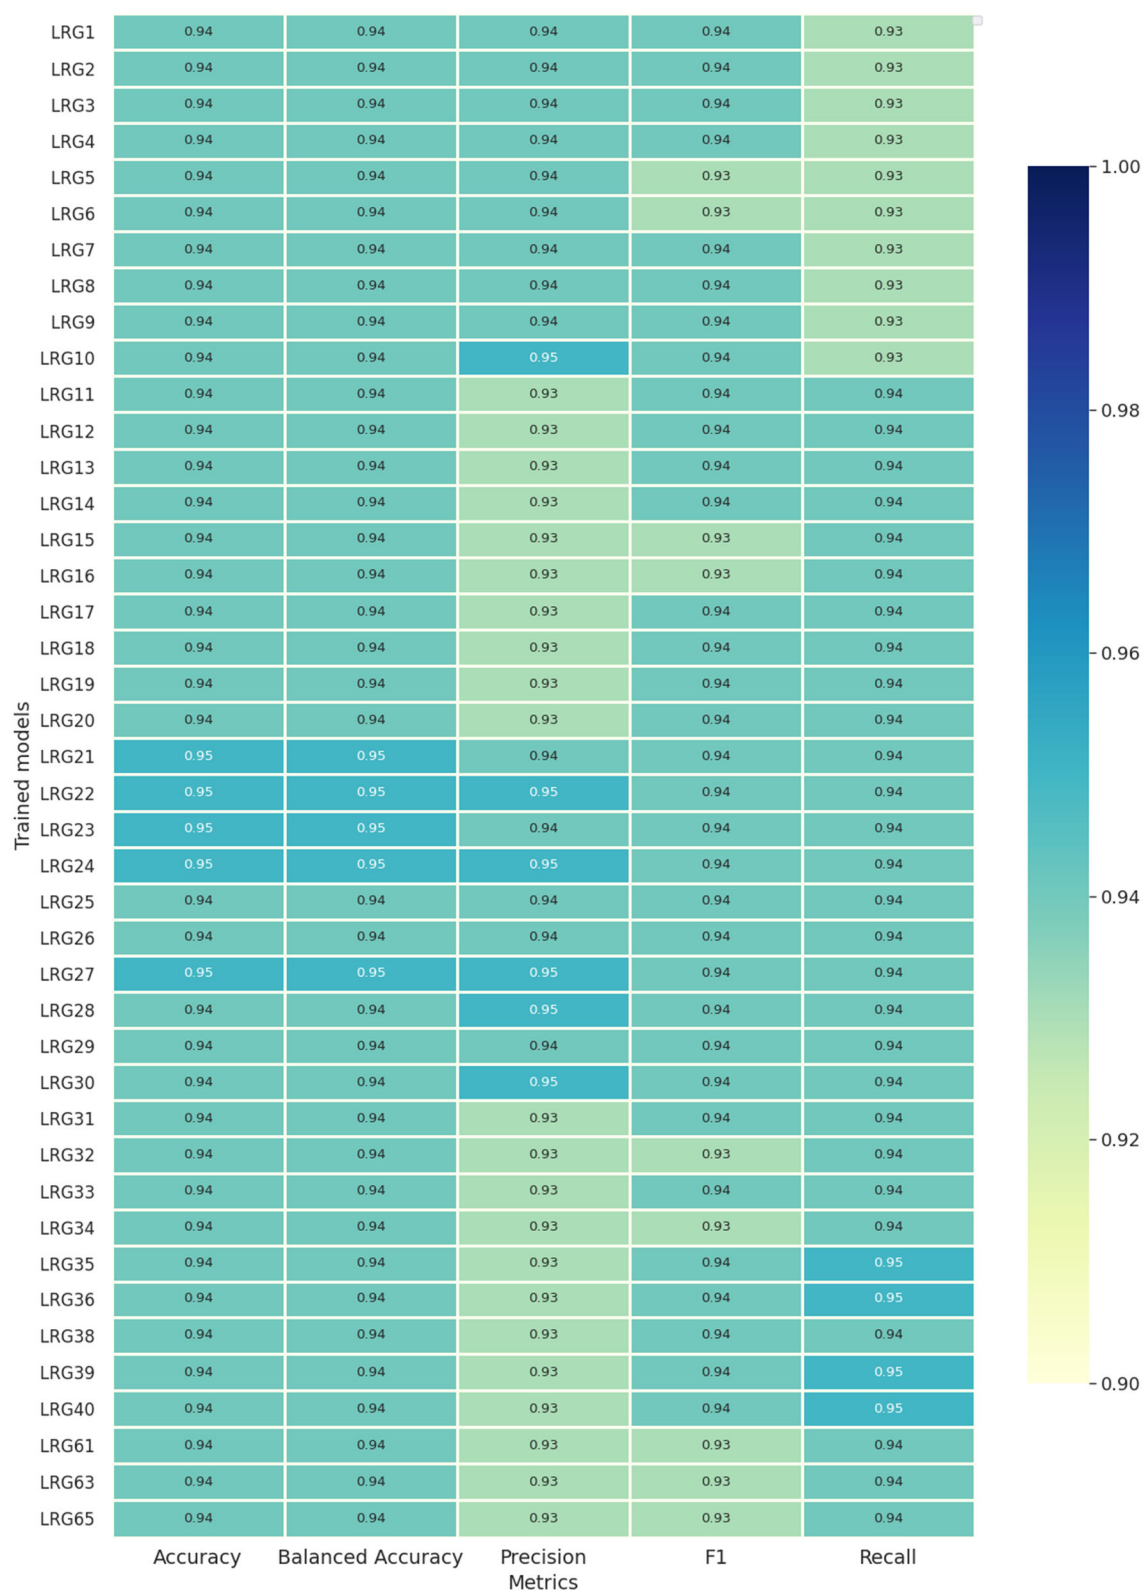**Figure S2.** LRG metrics heatmap.

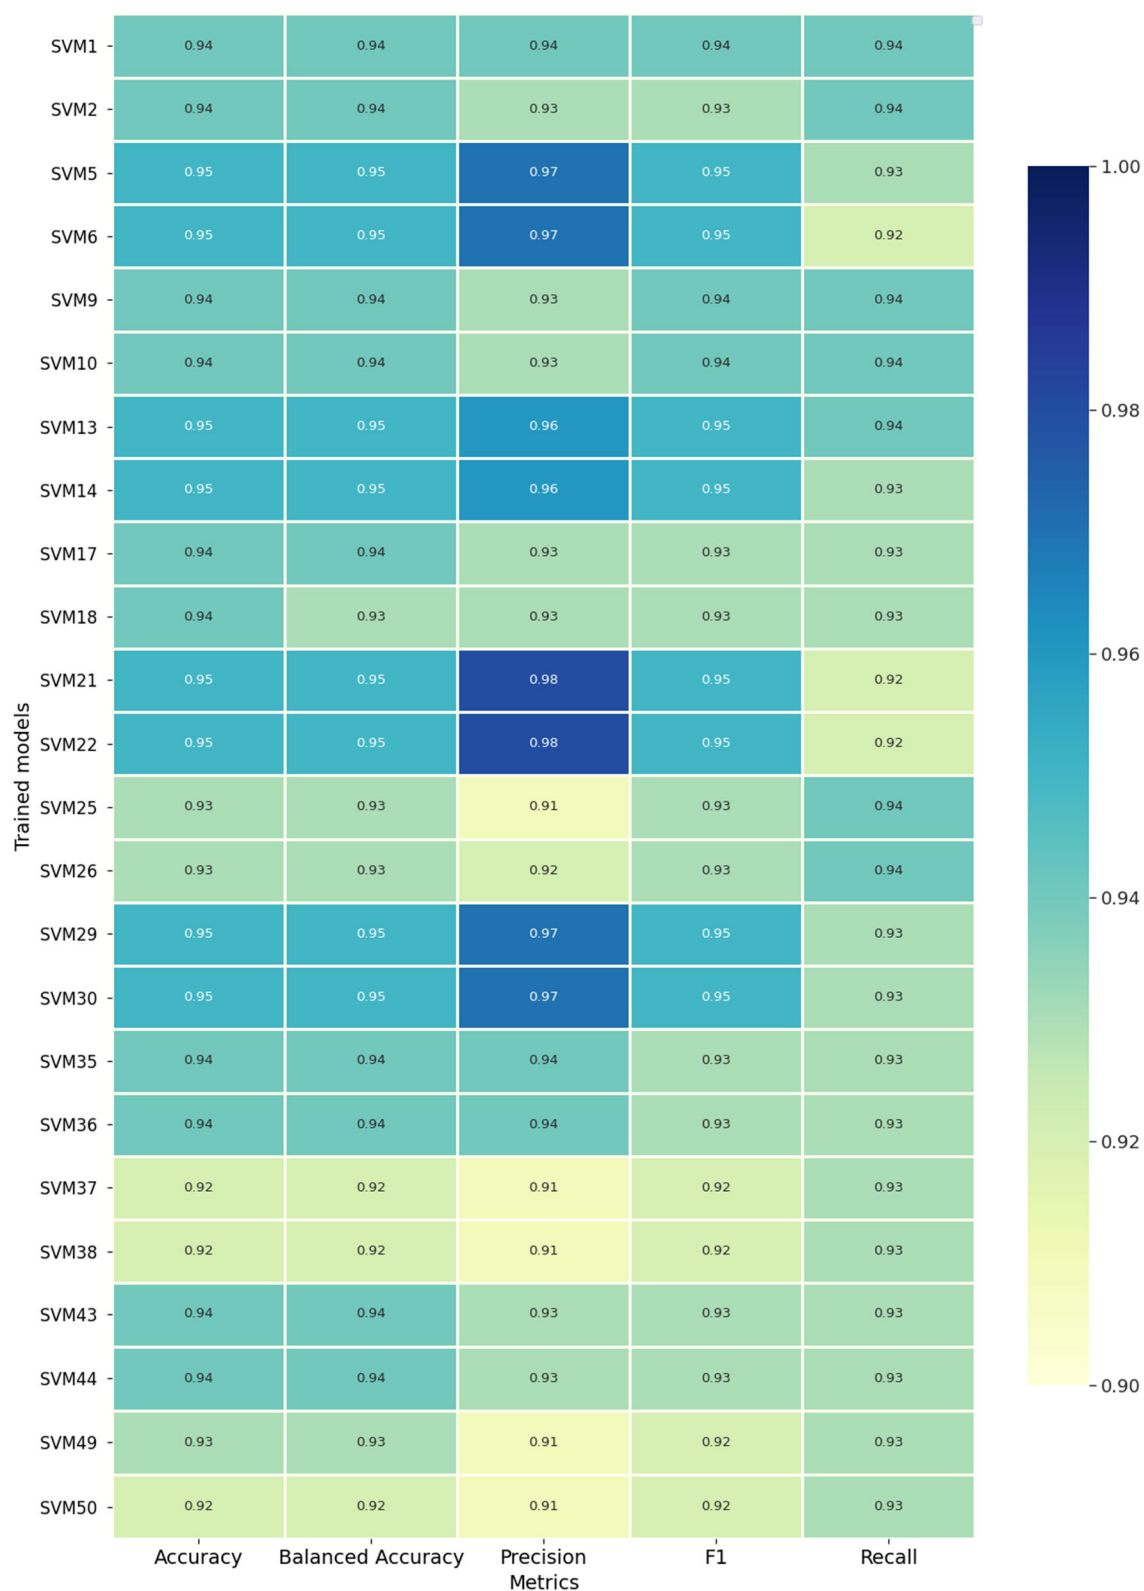**Figure S3.** SVM metrics heatmap.
